# Supplementary material for: Molecular surface functionalization to enhance the power output of triboelectric nanogenerators
Source: Royal Society of Chemistry journal article supplement (doi:10.1039/c5ta10239a), 2016-01-01
Supplement: c5ta10239a1.pdf [file c5ta10239a1.pdf]

**Supplementary Information:**

**Molecular Surface Functionalization to Enhance Power Output of  
Triboelectric Nanogenerators**

*Sihong Wang<sup>1, ‡</sup>, Yunlong Zi<sup>1, ‡</sup>, Yu Sheng Zhou<sup>1</sup>, Shengming Li<sup>1</sup>, Fengru Fan<sup>2</sup>, Long Lin<sup>1</sup>,*

*Zhong Lin Wang<sup>1, 2, \*</sup>*

<sup>1</sup> School of Materials Science and Engineering, Georgia Institute of Technology, Atlanta,  
Georgia 30332-0245, United States

<sup>2</sup> Beijing Institute of Nanoenergy and Nanosystems, Chinese Academy of Sciences, Beijing,  
China

‡These authors contributed equally.

\* Corresponding author: e-mail: [zlwang@gatech.edu](mailto:zlwang@gatech.edu)

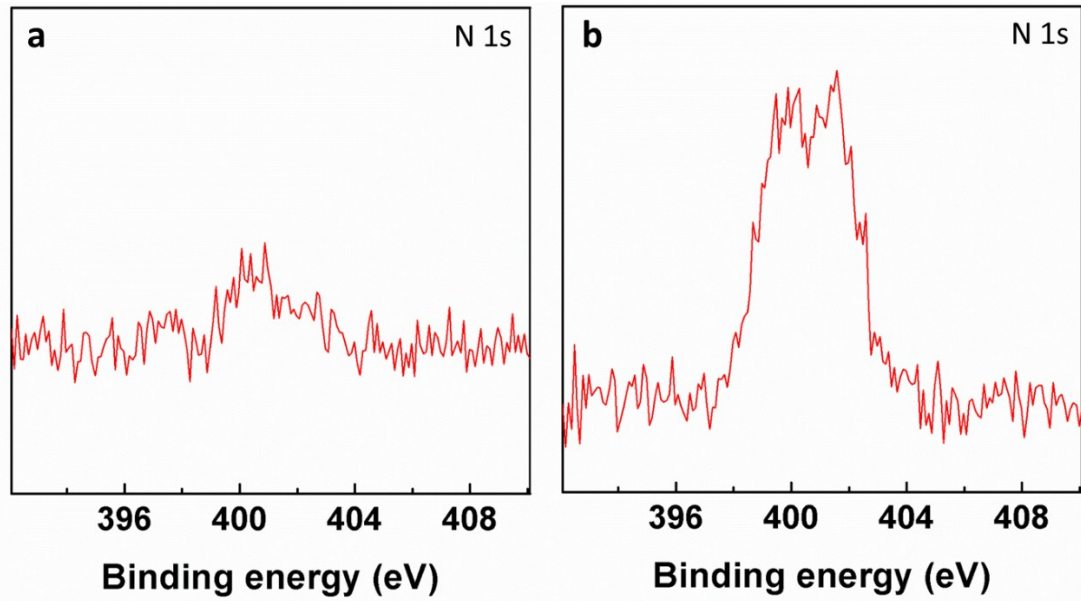

**Figure S1.** N 1s peaks of XPS spectra of (a) pristine silica and (b) functionalized silica by 10% APTES.

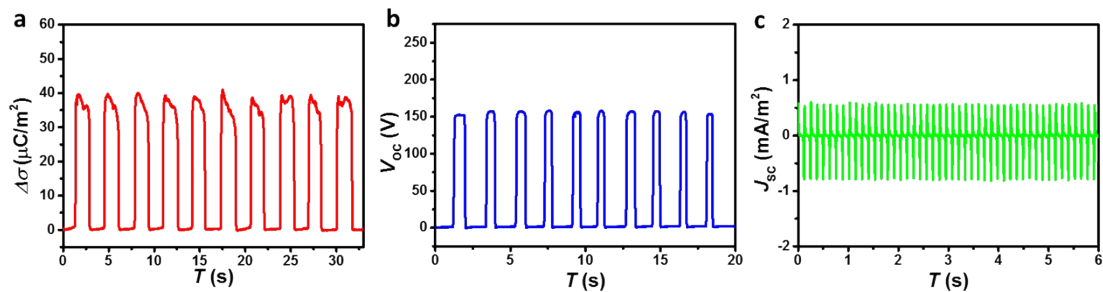

**Figure S2.** (a) Measured charge density, (b) the open-circuit voltage and (c) the short-circuit current density of the TENG with silica functionalized by 1% (in volume ratio) APTES, respectively.
